# Supplementary material
Source: PubMed Central journal article supplement (PMC4167574)
Supplement: NIHMS621848-supplement-01.pdf [file NIHMS621848-supplement-01.pdf]

## Appendix

### Online Reports of Foodborne Illness Capture Foods Implicated in Official Foodborne Outbreak Reports

Elaine O. Nsoesie PhD,<sup>1,2</sup> Sheryl A. Gordon MSc,<sup>1</sup> John S. Brownstein PhD<sup>1,2,3</sup>

1. Children's Hospital Informatics Program, Boston Children's Hospital, Boston, Massachusetts, 02215, USA
2. Department of Pediatrics, Harvard Medical School, Boston, Massachusetts, 02215, USA
3. Department of Epidemiology, Biostatistics and Occupational Health, McGill University, Montreal, Quebec, H3A 1A2, Canada

Table A.1: List of colleges included in the Yelp dataset.

| University                              | City            | State         |
|-----------------------------------------|-----------------|---------------|
| Brown University                        | Providence      | Rhode Island  |
| California Institute of Technology      | Pasadena        | California    |
| California Polytechnic State University | San Luis Obispo | California    |
| Carnegie Mellon University              | Pittsburg       | Pennsylvania  |
| Columbia University                     | New York        | New York      |
| Cornell University                      | Ithaca          | New York      |
| Georgia Institute of Technology         | Atlanta         | Georgia       |
| Harvard University                      | Cambridge       | Massachusetts |
| Harvey Mudd College                     | Claremont       | California    |
| Massachusetts Institute of Technology   | Cambridge       | Massachusetts |
| Princeton University                    | Princeton       | New Jersey    |
| Purdue University                       | West Lafayette  | Indiana       |
| Rensselaer Polytechnic Institute        | Troy            | New York      |
| Rice University                         | Houston         | Texas         |
| Stanford University                     | Stanford        | California    |
| University of California - Los Angeles  | Los Angeles     | California    |
| University of California - San Diego    | La Jolla        | California    |

|                                            |              |                |
|--------------------------------------------|--------------|----------------|
| University of California at Berkeley       | Berkeley     | California     |
| University of Illinois - Urbana-Champaign  | Champaign    | Illinois       |
| University of Maryland - College Park      | College Park | Maryland       |
| University of Massachusetts - Amherst      | Amherst      | Massachusetts  |
| University of Michigan - Ann Arbor         | Ann Arbor    | Michigan       |
| University of North Carolina - Chapel Hill | Chapel Hill  | North Carolina |
| University of Pennsylvania                 | Philadelphia | Pennsylvania   |
| University of Southern California          | Los Angeles  | California     |
| University of Texas – Austin               | Austin       | Texas          |
| University of Washington                   | Seattle      | Washington     |
| University of Wisconsin – Madison          | Madison      | Wisconsin      |
| Virginia Tech                              | Blacksburg   | Virginia       |

The city and state in which the universities are located are provided in columns two and three.

Table A.2: Keyword list

|                |               |                    |                |                |                          |
|----------------|---------------|--------------------|----------------|----------------|--------------------------|
| Stomach ache   | Stomach pain  | Abdominal pain     | Abdominal ache | Puk*           | Cronobacter              |
| Vomit*         | Throw* up     | Tummy upset        | Tummy pain     | Sick           | Clostridium              |
| Food poisoning | Threw up      | Nausea             | Spew           | Indigestion    | Cryptococcosis           |
| Spit*          | Heartburn     | Acidosis           | Gastro*        | The runs       | Cryptosporidiosis        |
| Diarrhea       | Amebiasis     | Anisakiasis        | Ascariasis     | Anthrax        | Cyclospora               |
| Botulism       | Brucellosis   | Campylobacteriosis | Cholera        | Ciguatoxin     | Cysticercosis            |
| Escherichia    | Giardia       | Helicobacter       | Hepatitis A    | Roundworm      | Diphyllobothr*           |
| Isosporiasis   | Leptospirosis | Listeri*           | Norovirus      | Rat-bite fever | E.coli/ Ecoli/<br>E coli |
| Rotavirus      | Salmonell*    | Shigell*           | Staphylococcus | Toxoplasmosis  | Viral                    |

|                            |                   |                 |             |         |                 |
|----------------------------|-------------------|-----------------|-------------|---------|-----------------|
|                            |                   |                 |             |         | gastroenteritis |
| Toxoplasma infection       | Trichinellosis    | Trichinosis     | Trichinella | Typhoid | Marine toxins   |
| Vibrio<br>parahaemolyticus | Vibrio vulnificus | Vibrio cholerae | Yersinia    |         |                 |

Keywords used in extracting reviews containing reports of foodborne illness. The keywords consist of foodborne diseases from the CDC and words associated with symptoms of foodborne illness.

Table A.3: Restaurant Inspection Websites

| State (City/County)             | Inspection Website                                                                                                                                                                                                                                                |
|---------------------------------|-------------------------------------------------------------------------------------------------------------------------------------------------------------------------------------------------------------------------------------------------------------------|
| Massachusetts<br>(Cambridge)    | <a href="http://www2.cambridgema.gov/inspectional/searchInspections.cfm?tnltext=Back%20to%20Search%20Food%20Handling%20Inspections">http://www2.cambridgema.gov/inspectional/searchInspections.cfm?tnltext=Back%20to%20Search%20Food%20Handling%20Inspections</a> |
| Georgia<br>(Fulton County)      | <a href="http://ga.state.gegov.com/georgia/history.cfm?id=877372&amp;inspID=1729884&amp;county=Fulton">http://ga.state.gegov.com/georgia/history.cfm?id=877372&amp;inspID=1729884&amp;county=Fulton</a>                                                           |
| California<br>(Berkeley)        | <a href="http://www.ci.berkeley.ca.us/environmentalhealth/inspections.asp">http://www.ci.berkeley.ca.us/environmentalhealth/inspections.asp</a>                                                                                                                   |
| California<br>(San Luis Obispo) | <a href="http://www.slocounty.ca.gov/health/publichealth/ehs/services/food/RestInspSearch.htm">http://www.slocounty.ca.gov/health/publichealth/ehs/services/food/RestInspSearch.htm</a>                                                                           |

Table A.4: Rankings of twenty most specific food categories for reports from CDC and Yelp. 2012 was excluded since Yelp data was incomplete.

| Year         | 2006 |      | 2007 |      | 2008 |      | 2009 |      | 2010 |      | 2011 |      |
|--------------|------|------|------|------|------|------|------|------|------|------|------|------|
| Category     | CDC  | Yelp |
| Beef         | 14   | 15.5 | 16   | 10.5 | 16.5 | 17   | 17   | 10   | 13   | 15   | 14.5 | 16   |
| Crustaceans  | 7    | 7    | 7    | 3.5  | 5.5  | 7.5  | 2.5  | 8.5  | 4.5  | 8.5  | 5.5  | 5    |
| Dairy        | 18   | 15.5 | 18   | 18   | 18   | 18   | 18   | 18   | 18   | 18   | 18   | 18   |
| Eggs         | 13   | 7    | 13.5 | 14   | 13   | 10   | 16   | 13   | 15   | 8.5  | 10   | 12   |
| Fish         | 12   | 7    | 11   | 10.5 | 12   | 15   | 10   | 8.5  | 12   | 8.5  | 9    | 10   |
| Fruits-nuts  | 10   | 7    | 13.5 | 14   | 11   | 14   | 13   | 14   | 10.5 | 14   | 12   | 9    |
| Fungi        | 5    | 7    | 4.5  | 10.5 | 5.5  | 3    | 2.5  | 4.5  | 4.5  | 5.5  | 5.5  | 5    |
| Game         | 1.5  | 7    | 1.5  | 3.5  | 2    | 3    | 2.5  | 2    | 4.5  | 2    | 5.5  | 1.5  |
| Grains-beans | 19   | 19   | 19   | 19   | 19   | 19   | 19   | 19   | 19   | 19   | 19   | 19   |
| Leafy        | 16   | 15.5 | 12   | 7.5  | 15   | 12.5 | 12   | 15   | 17   | 11   | 14.5 | 14   |
| Meat         | 6    | 15.5 | 4.5  | 7.5  | 2    | 6    | 5.5  | 11.5 | 4.5  | 8.5  | 2    | 12   |
| Mollusks     | 8    | 7    | 4.5  | 3.5  | 8.5  | 7.5  | 7    | 6.5  | 9    | 4    | 11   | 8    |
| Pork         | 9    | 7    | 10   | 10.5 | 10   | 12.5 | 11   | 6.5  | 10.5 | 12   | 13   | 7    |
| Poultry      | 15   | 18   | 17   | 16   | 14   | 16   | 14   | 17   | 14   | 17   | 17   | 17   |
| Root         | 11   | 7    | 9    | 14   | 5.5  | 10   | 8.5  | 11.5 | 7.5  | 13   | 5.5  | 12   |
| Shellfish    | 3    | 7    | 1.5  | 3.5  | 2    | 3    | 2.5  | 2    | 1.5  | 2    | 2    | 1.5  |
| Sprout       | 1.5  | 7    | 4.5  | 3.5  | 8.5  | 3    | 8.5  | 2    | 7.5  | 2    | 8    | 5    |
| Vegetables   | 4    | 7    | 8    | 3.5  | 5.5  | 3    | 5.5  | 4.5  | 1.5  | 5.5  | 2    | 3    |
| Vine-stalk   | 17   | 7    | 15   | 17   | 16.5 | 10   | 15   | 16   | 16   | 16   | 16   | 15   |

Table A.5: Yelp’s foodservice business categories

|                |                 |                    |                        |                 |                    |                           |                |                        |            |
|----------------|-----------------|--------------------|------------------------|-----------------|--------------------|---------------------------|----------------|------------------------|------------|
| Restaurants    | Afghan          | African            | American               | Arabian         | Argentine          | Armenian                  | Asian Fusion   | Australian             | Austrian   |
| Bangladeshi    | Barbeque        | Basque             | Belgian                | Brasseries      | Brazilian          | Breakfast & Brunch        | British        | Buffets                | Burgers    |
| Burmese        | Cafes           | Cafeteria          | Cajun/Creole           | Cambodian       | Caribbean          | Catalan                   | Cheesesteaks   | Chicken Wings          | Chinese    |
| Senegalese     | South African   | Comfort Food       | Creperies              | Cuban           | Czech              | Delis                     | Diners         | Ethiopian              | Fast Food  |
| Filipino       | Fish & Chips    | Fondue             | Food Court             | Food Stands     | French             | Gastropubs                | German         | Gluten-Free            | Greek      |
| Halal          | Hawaiian        | Himalayan/Nepalese | Hot Dogs               | Hot Pot         | Hungarian          | Iberian                   | Indian         | Indonesian             | Irish      |
| Italian        | Japanese        | Korean             | Kosher                 | Laotian         | Latin American     | Live/Raw Food             | Malaysian      | Mediterranean          | Mexican    |
| Middle Eastern | Modern European | Mongolian          | Pakistani              | Persian/Iranian | Peruvian           | Pizza                     | Polish         | Portuguese             | Russian    |
| Salad          | Sandwiches      | Scandinavian       | Scottish               | Seafood         | Singaporean        | Slovakian                 | Soul Food      | Soup                   | Southern   |
| Spanish        | Steakhouses     | Sushi Bars         | Taiwanese              | Tapas Bars      | Tapas/Small Plates | Tex-Mex                   | Thai           | Turkish                | Ukrainian  |
| Vegan          | Vegetarian      | Vietnamese         | Dominican              | Haitian         | Puerto Rican       | Trinidadian               | Columbian      | Salvadoran             | Venezuelan |
| Cantonese      | Dim Sum         | Shanghainese       | Szechuan               | Egyptian        | Lebanese           | Food                      | Bagels         | Bakeries               | Bubble Tea |
| Coffee & Tea   | Desserts        | Donuts             | Food Delivery Services | Food Trucks     | Gelato             | Ice Cream & Frozen Yogurt | Internet Cafes | Juice Bars & Smoothies | Pretzels   |
| Specialty Food | Candy Stores    | Cheese Shops       | Chocolatiers & Shops   | Ethnic Food     | Fruits & Veggies   | Street Vendors            | Tea Rooms      |                        |            |

General categories such as “restaurants” and specific categories such as “thai” are included.
